# Supplementary material for: Carvedilol prevents impairment of the counterregulatory response in recurrently hypoglycaemic diabetic rats
Source: PubMed Central journal article supplement (PMC8029566; doi:10.1002/edm2.226), 2021-02-06
Supplement: EDM2-4-e00226-s001.pdf [file EDM2-4-e00226-s001.pdf]

**Supplemental Table 1:** Average daily blood glucose concentrations (mg/dl) in STZ-diabetic rats during the recurrent saline (STZ) or recurrent insulin treatments (STZ+RH and STZ+RH+4.5 Carvedilol groups). Data presented as mean  $\pm$  S.E.M.

|       | Time (min) | STZ (n=7)        | STZ + RH (n=6)   | STZ + RH + 4.5 Carvedilol (n=7) |
|-------|------------|------------------|------------------|---------------------------------|
| Day 1 | 0          | 413.5 $\pm$ 27.1 | 483.3 $\pm$ 42.1 | 478.3 $\pm$ 42.4                |
|       | 30         | 384.5 $\pm$ 48.0 | 245.5 $\pm$ 52.9 | 215.0 $\pm$ 54.4                |
|       | 60         | 363.5 $\pm$ 40.4 | 94.5 $\pm$ 11.0  | 90.8 $\pm$ 4.1                  |
|       | 90         | 376.8 $\pm$ 15.6 | 53.8 $\pm$ 12.3  | 80.3 $\pm$ 13.9                 |
|       | 120        | 367.8 $\pm$ 17.7 | 36.3 $\pm$ 3.4   | 35.3 $\pm$ 7.4                  |
|       | 150        | 360.3 $\pm$ 29.8 | 37.0 $\pm$ 4.5   | 30.0 $\pm$ 3.4                  |
|       | 180        | 365.0 $\pm$ 30.0 | 34.5 $\pm$ 4.9   | 31.0 $\pm$ 0.4                  |
| Day 2 | 0          | 429.3 $\pm$ 35.1 | 462.3 $\pm$ 43.6 | 448.0 $\pm$ 42.5                |
|       | 30         | 416.8 $\pm$ 35.5 | 173.8 $\pm$ 64.9 | 124.3 $\pm$ 29.8                |
|       | 60         | 375.5 $\pm$ 49.3 | 82.5 $\pm$ 23.2  | 59.0 $\pm$ 15.6                 |
|       | 90         | 372.8 $\pm$ 50.9 | 63.8 $\pm$ 21.0  | 38.5 $\pm$ 10.7                 |
|       | 120        | 377.3 $\pm$ 40.6 | 43.3 $\pm$ 6.4   | 30.0 $\pm$ 2.9                  |
|       | 150        | 382.5 $\pm$ 30.3 | 30.3 $\pm$ 5.6   | 31.0 $\pm$ 2.5                  |
|       | 180        | 370.3 $\pm$ 26.5 | 32.0 $\pm$ 4.7   | 31.5 $\pm$ 4.3                  |
| Day 3 | 0          | 414.8 $\pm$ 31.3 | 486.5 $\pm$ 64.5 | 453.0 $\pm$ 47.1                |
|       | 30         | 426.5 $\pm$ 38.9 | 213.0 $\pm$ 56.2 | 213.5 $\pm$ 64.8                |
|       | 60         | 382.0 $\pm$ 42.6 | 134.5 $\pm$ 38.9 | 164.0 $\pm$ 73.6                |
|       | 90         | 382.8 $\pm$ 26.4 | 75.0 $\pm$ 28.2  | 80.8 $\pm$ 27.4                 |
|       | 120        | 389.8 $\pm$ 36.1 | 46.3 $\pm$ 16.0  | 38.0 $\pm$ 4.4                  |
|       | 150        | 375.0 $\pm$ 41.7 | 31.5 $\pm$ 8.6   | 32.8 $\pm$ 4.9                  |
|       | 180        | 381.8 $\pm$ 43.8 | 37.8 $\pm$ 4.5   | 29.8 $\pm$ 3.4                  |
